# Supplementary material for: Resolution dependence of CO2-induced Tropical Atlantic sector climate changes
Source: Springer Nature journal article supplement (doi:10.1038/s41612-020-00139-6), 2020-09-15
Supplement: MOESM1 [file 41612_2020_139_MOESM1_ESM.pdf]

## Supplementary Figures

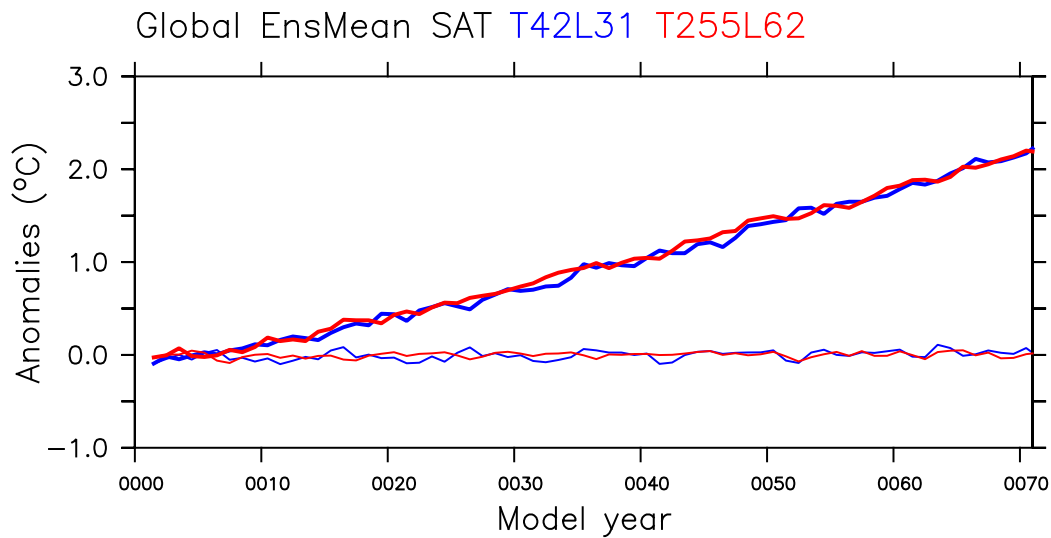

**Supplementary Figure 1. Global mean surface air temperature evolution.** Ensemble-mean response of globally averaged surface air temperature (°C) to increasing atmospheric CO<sub>2</sub>-concentration simulated with the two versions of the climate model (KCM), KCM-LR (blue) and KCM-HR (red). The atmospheric CO<sub>2</sub>-concentration increases at a rate of 1 % per year, starting from present-day levels (348 ppm), until the CO<sub>2</sub>-concentration doubles at year 70. Thick lines indicate the climate change simulations, the thin lines the control simulations with constant present-day atmospheric CO<sub>2</sub>-concentration. Each global warming ensemble consists of 5 realizations starting from different oceanic and atmospheric conditions taken from the respective control run. The subsequent 70 years are used to calculate the control-run mean, to which the global warming simulations are compared.

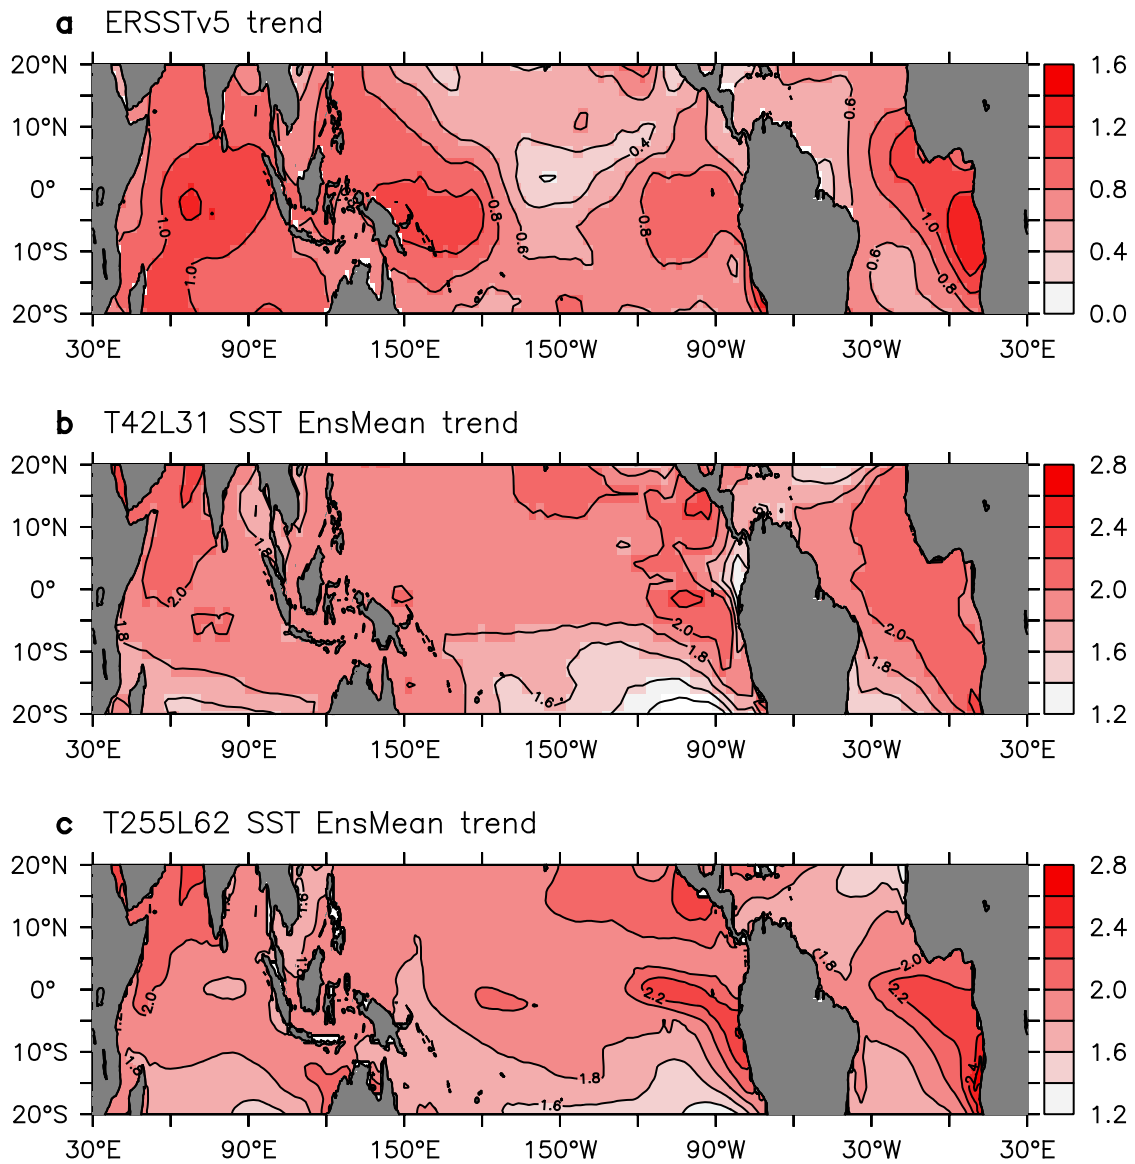

**Supplementary Figure 2. Tropical SST trend in observations and models.** (a) Linear SST trends ( $^{\circ}\text{C}$  per 68 yrs) during 1951-2018 from ERSSTv5 ( $\text{CI}=0.2^{\circ}\text{C}$ ). (b, c) Ensemble-mean trends ( $^{\circ}\text{C}$  per 70 yrs) of SST, calculated over all 70 years, from the global warming simulations with KCM-LR (b) and KCM-HR (c). Annual-mean data are used.

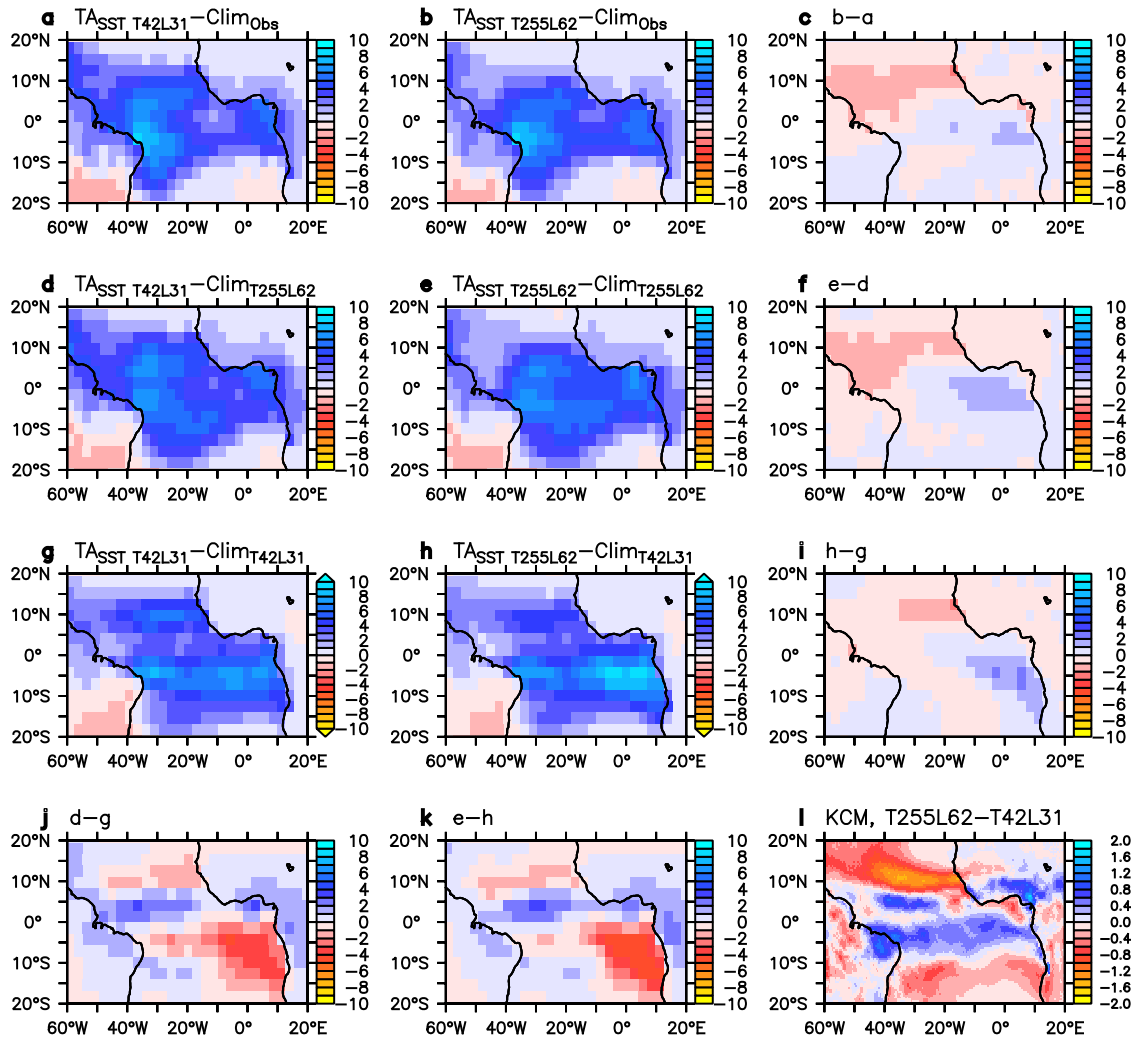

**Supplementary Figure 3. Rainfall response in low-resolution AGCM.** (a-k) Same as Fig. 6a-k except that AGCM ECHAM5 with T42L31 resolution (ECHAM5-LR) is used here. (l) Rainfall trend difference (mm day<sup>-1</sup> per 70 yrs) between KCM-HR (Fig. 3b) and KCM-LR (Fig. 3a). Note that the difference is calculated on the ECHAM5-HR grid in this case.
